# Supplementary material for: Electrochemical operational principles and analytical performance of Pd-based amperometric nanobiosensors
Source: Royal Society of Chemistry journal article supplement (doi:10.1039/d1an00882j), 2021-01-01
Supplement: d1an00882j1.pdf [file d1an00882j1.pdf]

## Supplementary Materials

### Electrochemical Operational Principles and Analytical Performance of Pd-based Amperometric Nanobiosensors

*Y.E. Silina<sup>1\*</sup>, N. Apushkinskaya<sup>1</sup>,  
N.V. Talagaeva<sup>2</sup>, M.G. Levchenko<sup>2</sup>, E.V. Zolotukhina<sup>2,3\*</sup>*

*<sup>1</sup>Institute for Biochemistry, Zentrum für Human und Molekularbiologie (ZHMB),  
Campus B 2.2, University of Saarland, 66123, Saarbrücken, Germany*

*<sup>2</sup>Institute of Problems of Chemical Physics RAS, 1 Ac. Semenov avenue, Chernogolovka,  
142432, Moscow region, Russia*

*<sup>3</sup>Moscow Institute of Physics and Technology, 9 Institutskiy per., Dolgoprudny,  
141700, Moscow region, Russia*

\*To whom the correspondence  
should be addressed/\*authors with equal contribution

*E-mail address 1: [yuliya.silina@uni-saarland.de](mailto:yuliya.silina@uni-saarland.de); [yuliya.silina@gmx.de](mailto:yuliya.silina@gmx.de) (Y.E. Silina)*

*E-mail address 2: [zolek@icp.ac.ru](mailto:zolek@icp.ac.ru) (E.V. Zolotukhina)*

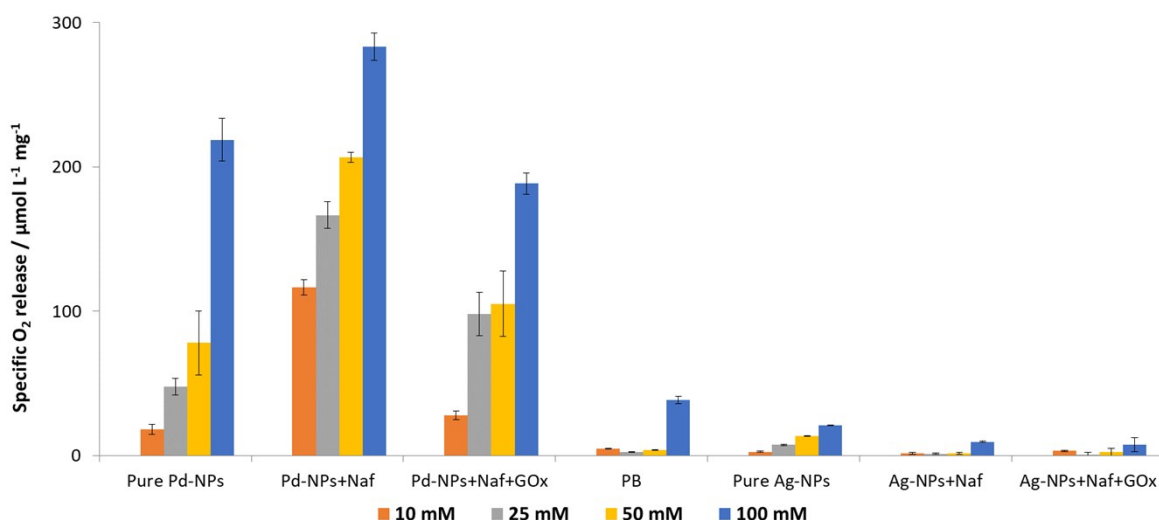

**Figure S1.** The effective response of the optical oxygen microsensor (dissolved oxygen, DO,  $\mu\text{mol/L}$  divided into functional layer weight, mg) during the reaction between hydrogen peroxide (in phosphate buffer, pH = 6.98), pure/intact Pd-NPs, PB, Ag-NPs, and their hybrids (shown for GOx and Nafion as a case study). *Note:* the experiments were performed at room temperature,  $20 \pm 2$  °C and signal was recorded by minisensor at 100 s ones the CV measurements were started. The experiments were performed in a triplicate as results were estimated as  $\pm$  SD. Amount of co-deposits/functional layer measured by QCM-sense system.

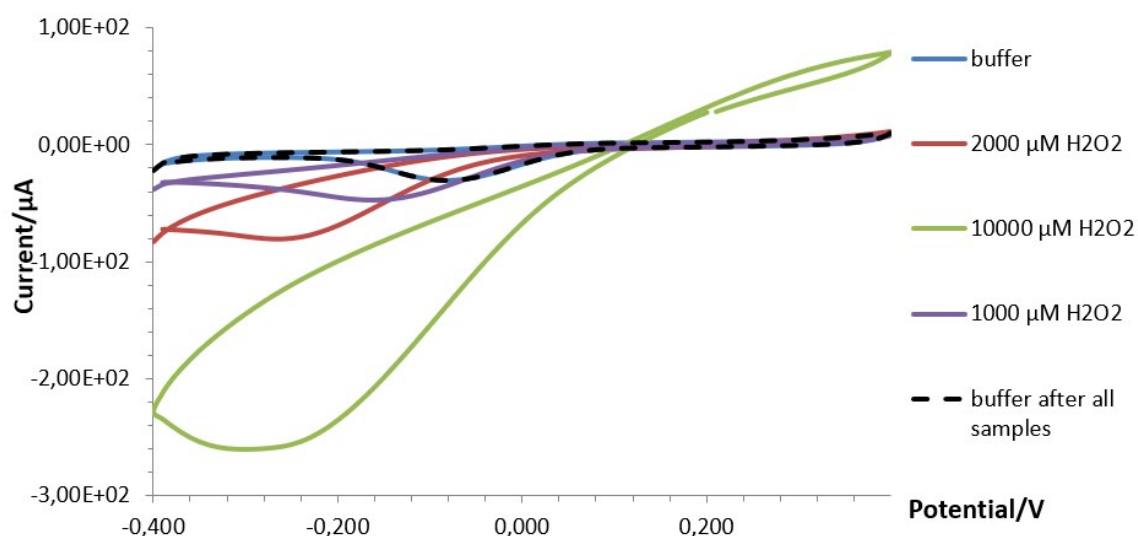

**Figure S2.** CV curves recorded on SPE/GO modified by pure Pd-NPs (-2.5 mA for 30 s) in the presence of hydrogen peroxide at the scan rate of 20 mV/s and pH 7 vs Ag/AgCl/sat.KCl. *Note:* the provided curves indicate that no irreversible changes occur on the surface of SPE/GO modified by Pd-NPs after H<sub>2</sub>O<sub>2</sub> decomposition.

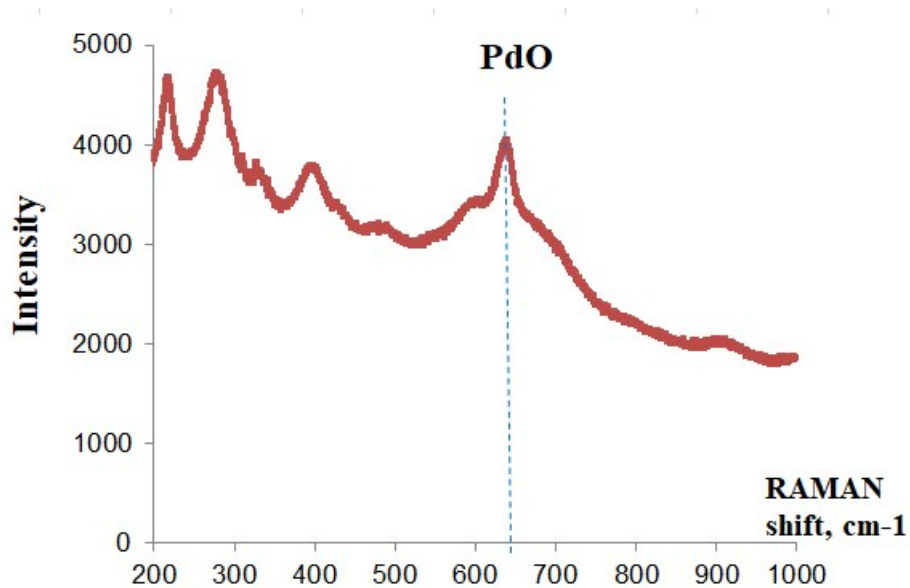

**Figure S3.** Raman spectra recorded from Pd-NPs-based nanobiosensor indicating presence of PdO at 640 nm<sup>-1</sup>. *Note:* the peak at 640 nm<sup>-1</sup> was approved as PdO according to (A. Baylet, P. Marécot, D. Duprez, P. Castellazzi, G. Groppi, *Phys. Chem. Chem. Phys.*, 2011, 13, 4607-4613. <https://doi.org/10.1039/C0CP01331E>)

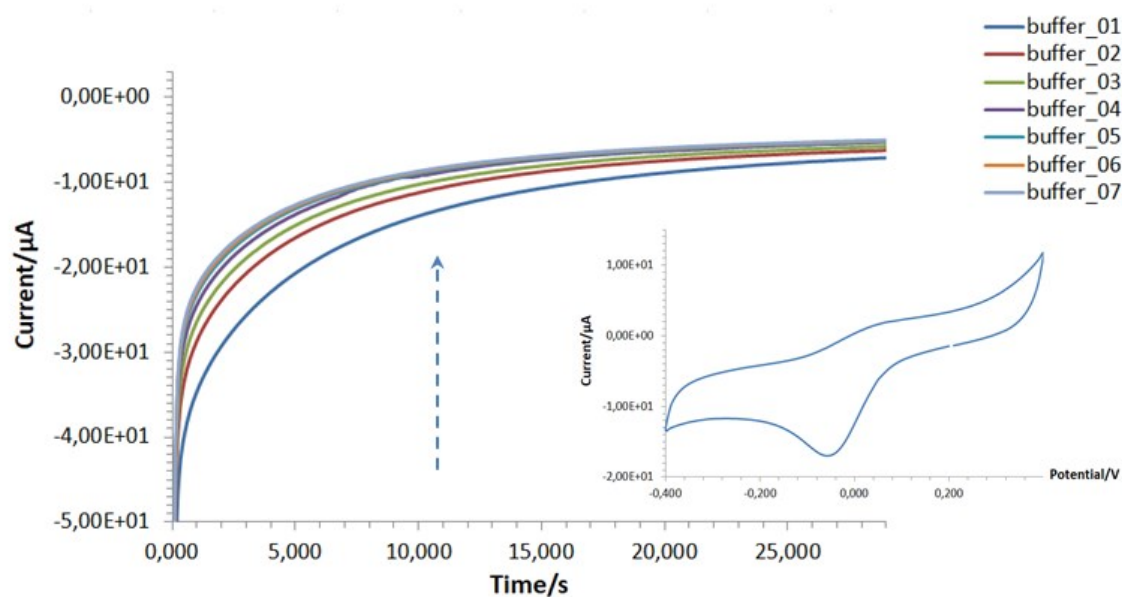

**Figure S4.** Chronoamperometric curves recorded from one-step produced AOx/Nafion/Pd-NPs hybrid in phosphate buffer with a new droplet at the applied potential of -0.05 V. The insert (CV curve) was obtained at 20 mV/s, pH = 7.

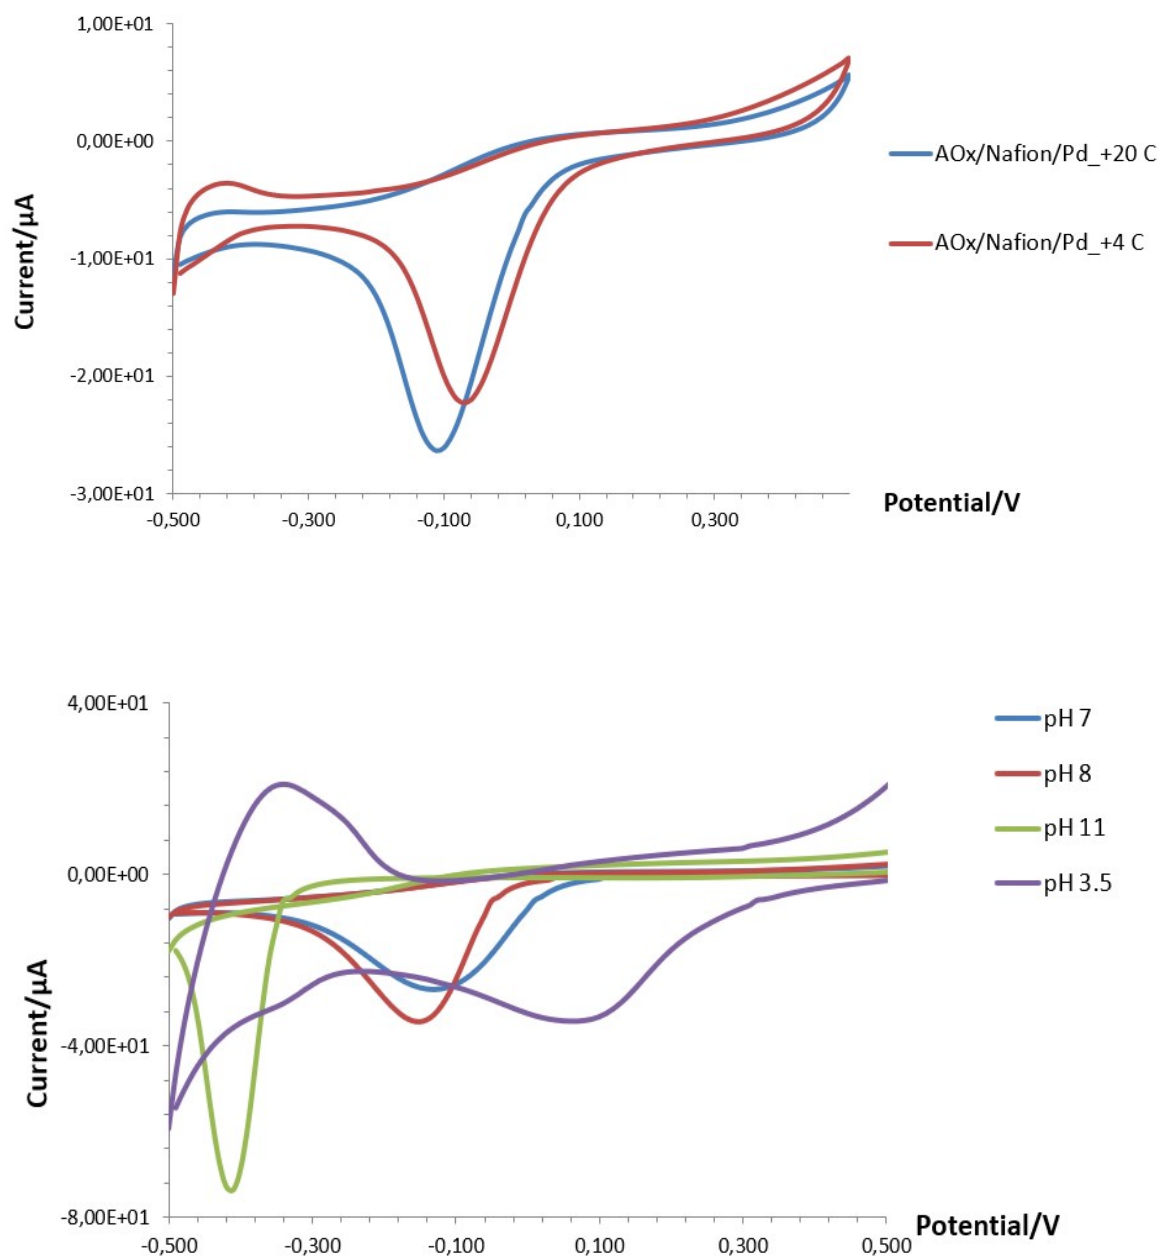

**Figure S5.** CV curves recorded in phosphate buffer at scan rate 20 mV/s from:  
*(top)* – AOx/Naf/Pd nanobiosensors dried/stored at +4 °C and at +20 °C, pH 7;  
*(bottom)* – GOx/Naf/Pd nanobiosensor (dried/stored at +4 °C) and tested in phosphate buffer at various pH.

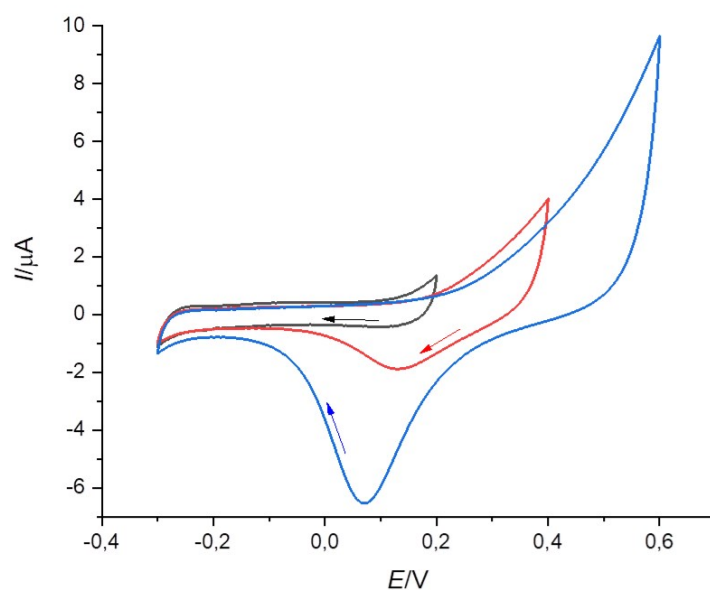

**Figure S6.** CV curves recorded in phosphate buffer on Pd-NPs-modified GCE (Ar-atmosphere, in the absence of O<sub>2</sub>, black line) at scan rate of 10 mV/sec, pH 7.5. *Note:* Red and blue lines were obtained in the presence of oxygen. Anodic scan limit was set as follows: 0.2, 0.4 and 0.6 V vs Ag/AgCl/sat.KCl.

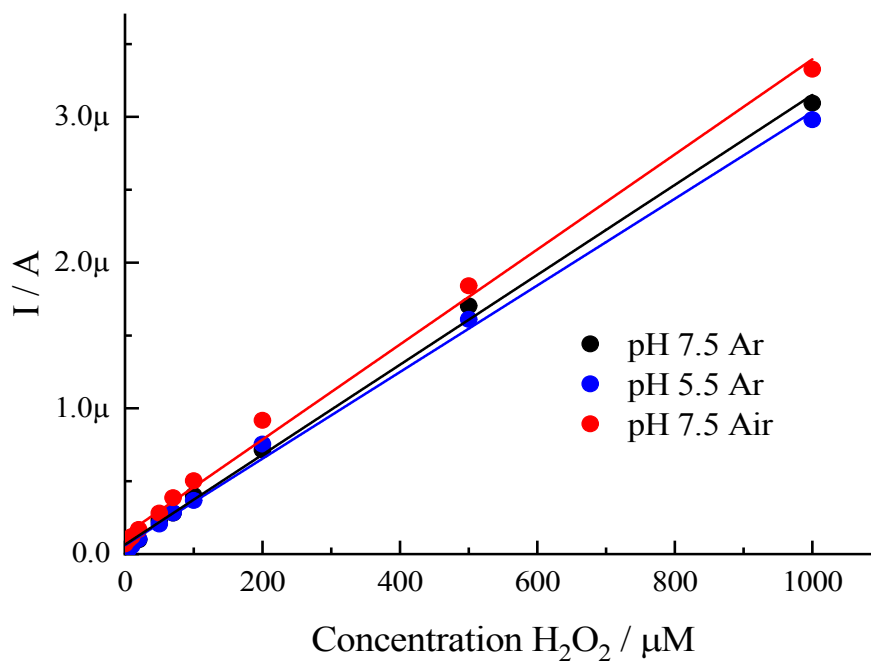

**Figure S7.** Steady-state current responses recorded at different pH on GCE modified by Pd-NPs in phosphate buffer with various concentrations of H<sub>2</sub>O<sub>2</sub> at potential 0.4 V.

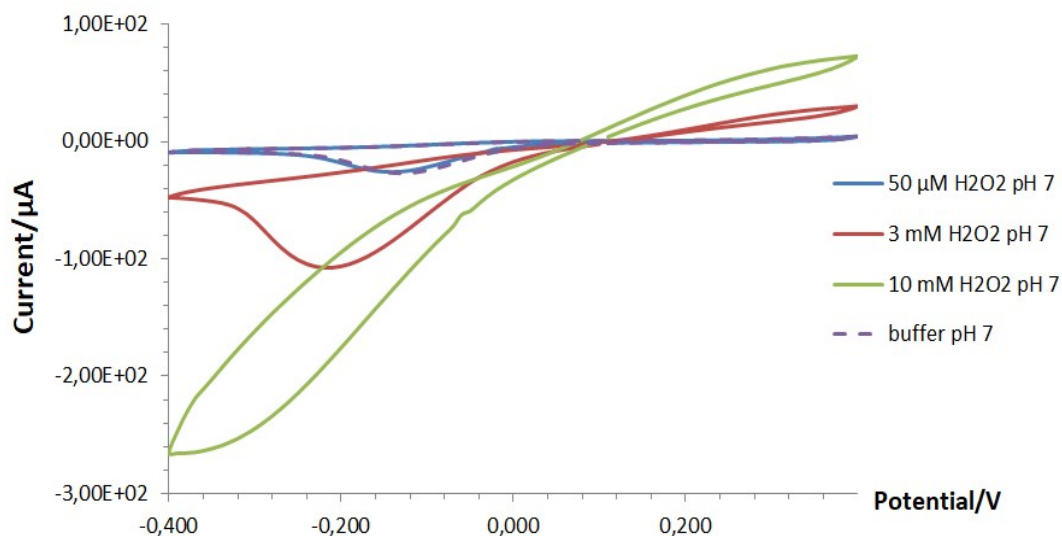

**Figure S8.** CV curves recorded on SPE/GO modified by Pd-NPs at 20 mV/s in phosphate buffer and H<sub>2</sub>O<sub>2</sub> solutions (pH = 6.98) in the range from -0.4 V to 0.4 V.

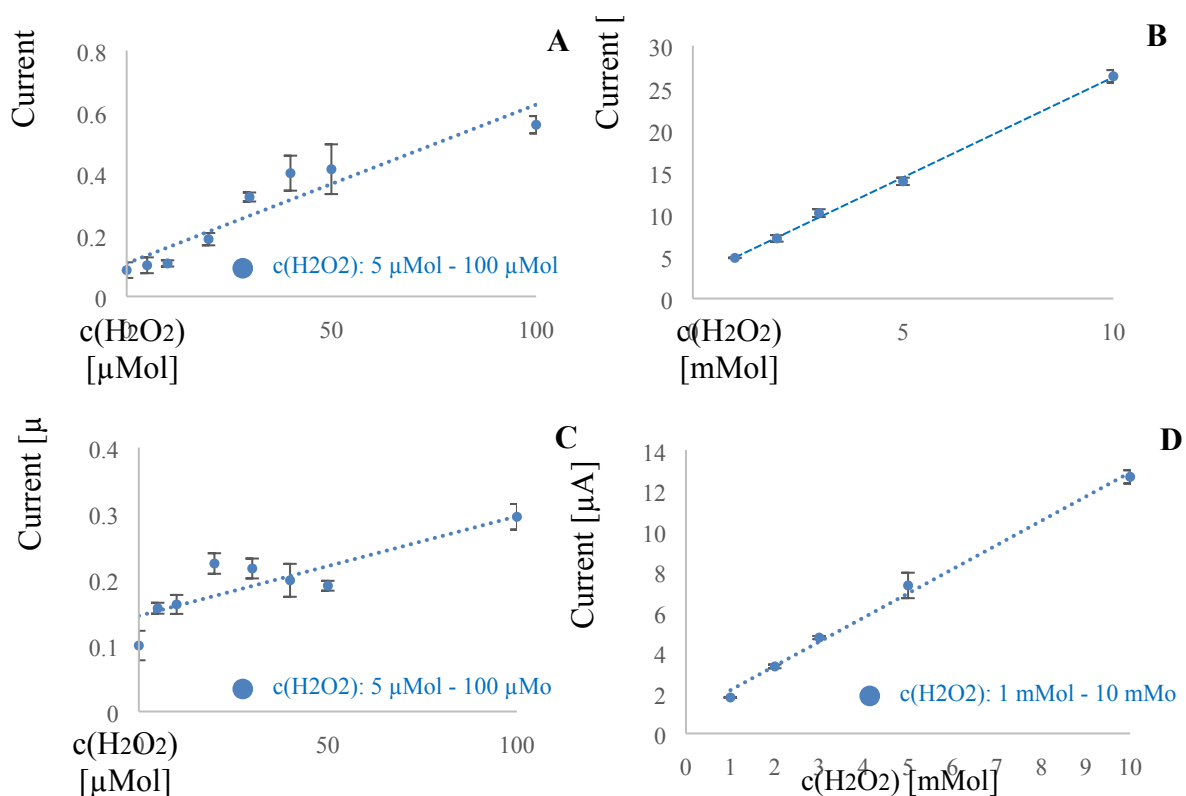

**Figure S9.** The calibration curves obtained for H<sub>2</sub>O<sub>2</sub> in analytically relevant concentration range in multi-step amperometry mode (MAM): -0.08 V polarization voltage for 30 s (*step 1*) followed by 0.2 V for 60 s (*step 2*) from Pd-NPs synthesized at 30 s (**A,B**); 60 s (**C,D**). *Note:* the experiments were performed at pH = 6.98, n = 3.

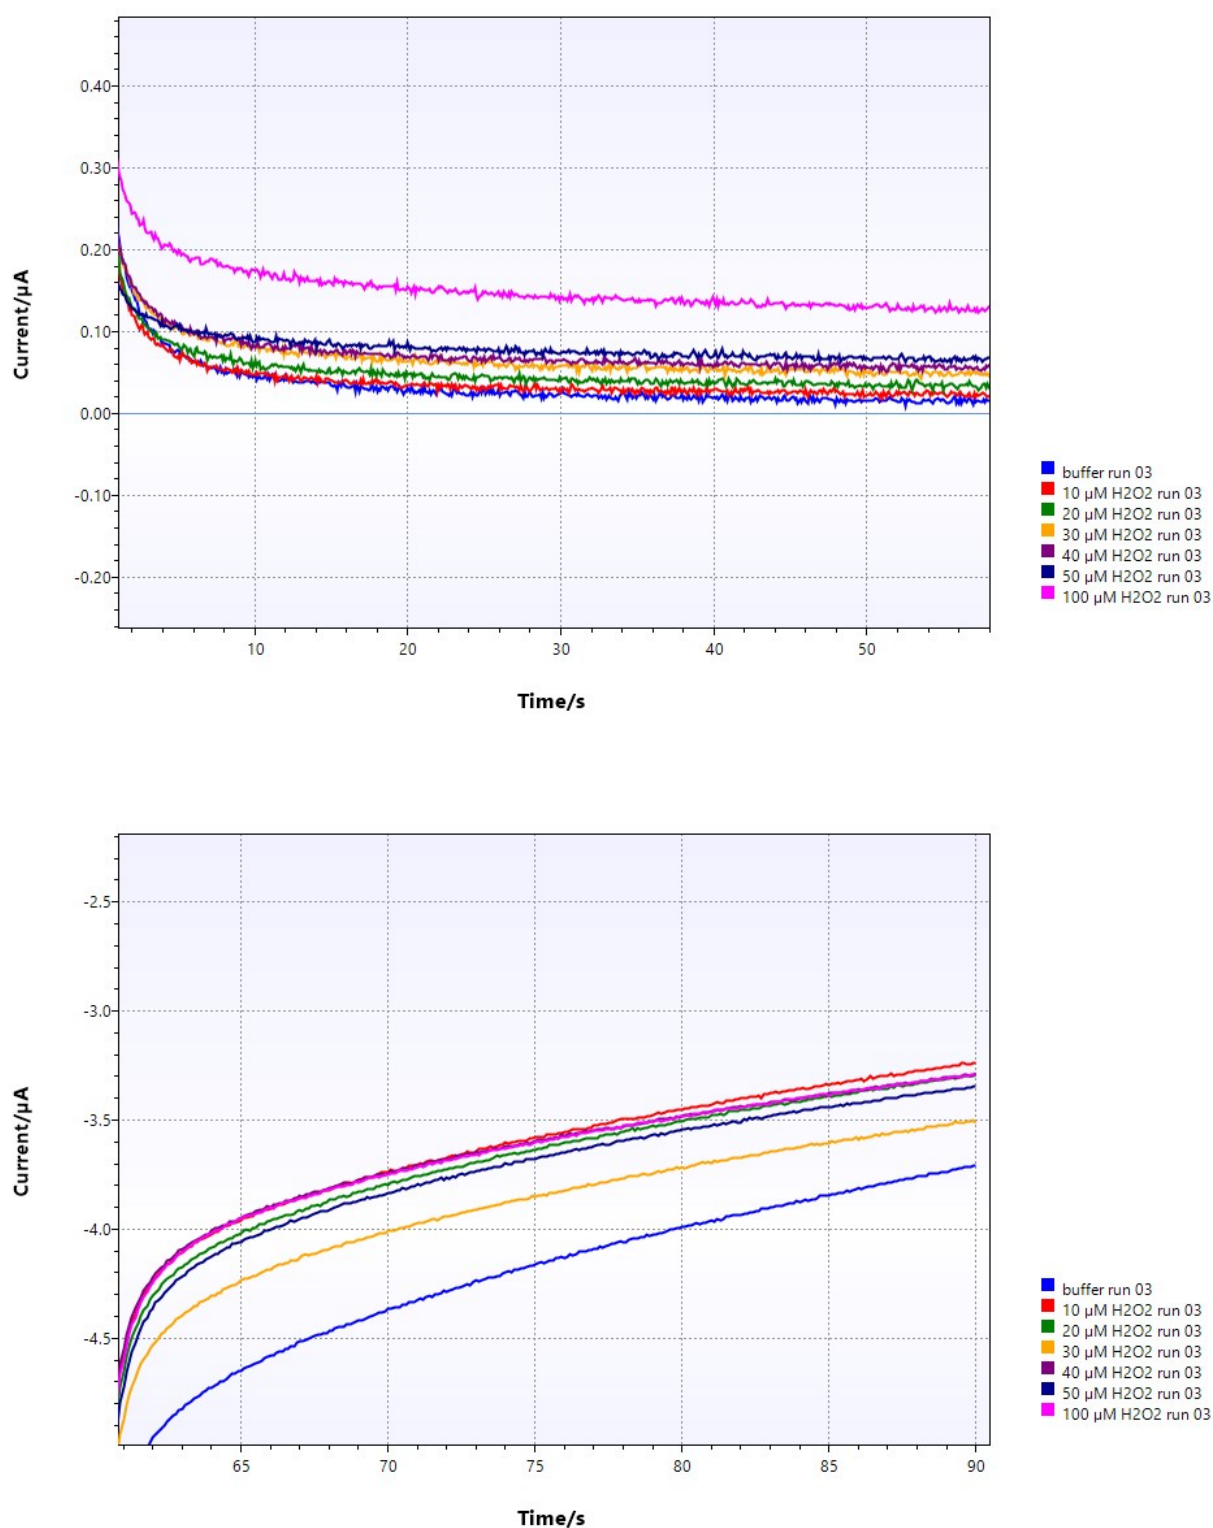

**Figure S10.** The analytical performance of SPE/GO modified by Pd-NPs in phosphate buffer towards peroxide decomposition recorded in multistep amperometric mode at the potential of 0.2 V (*top*) and -0.08 V (*bottom*).

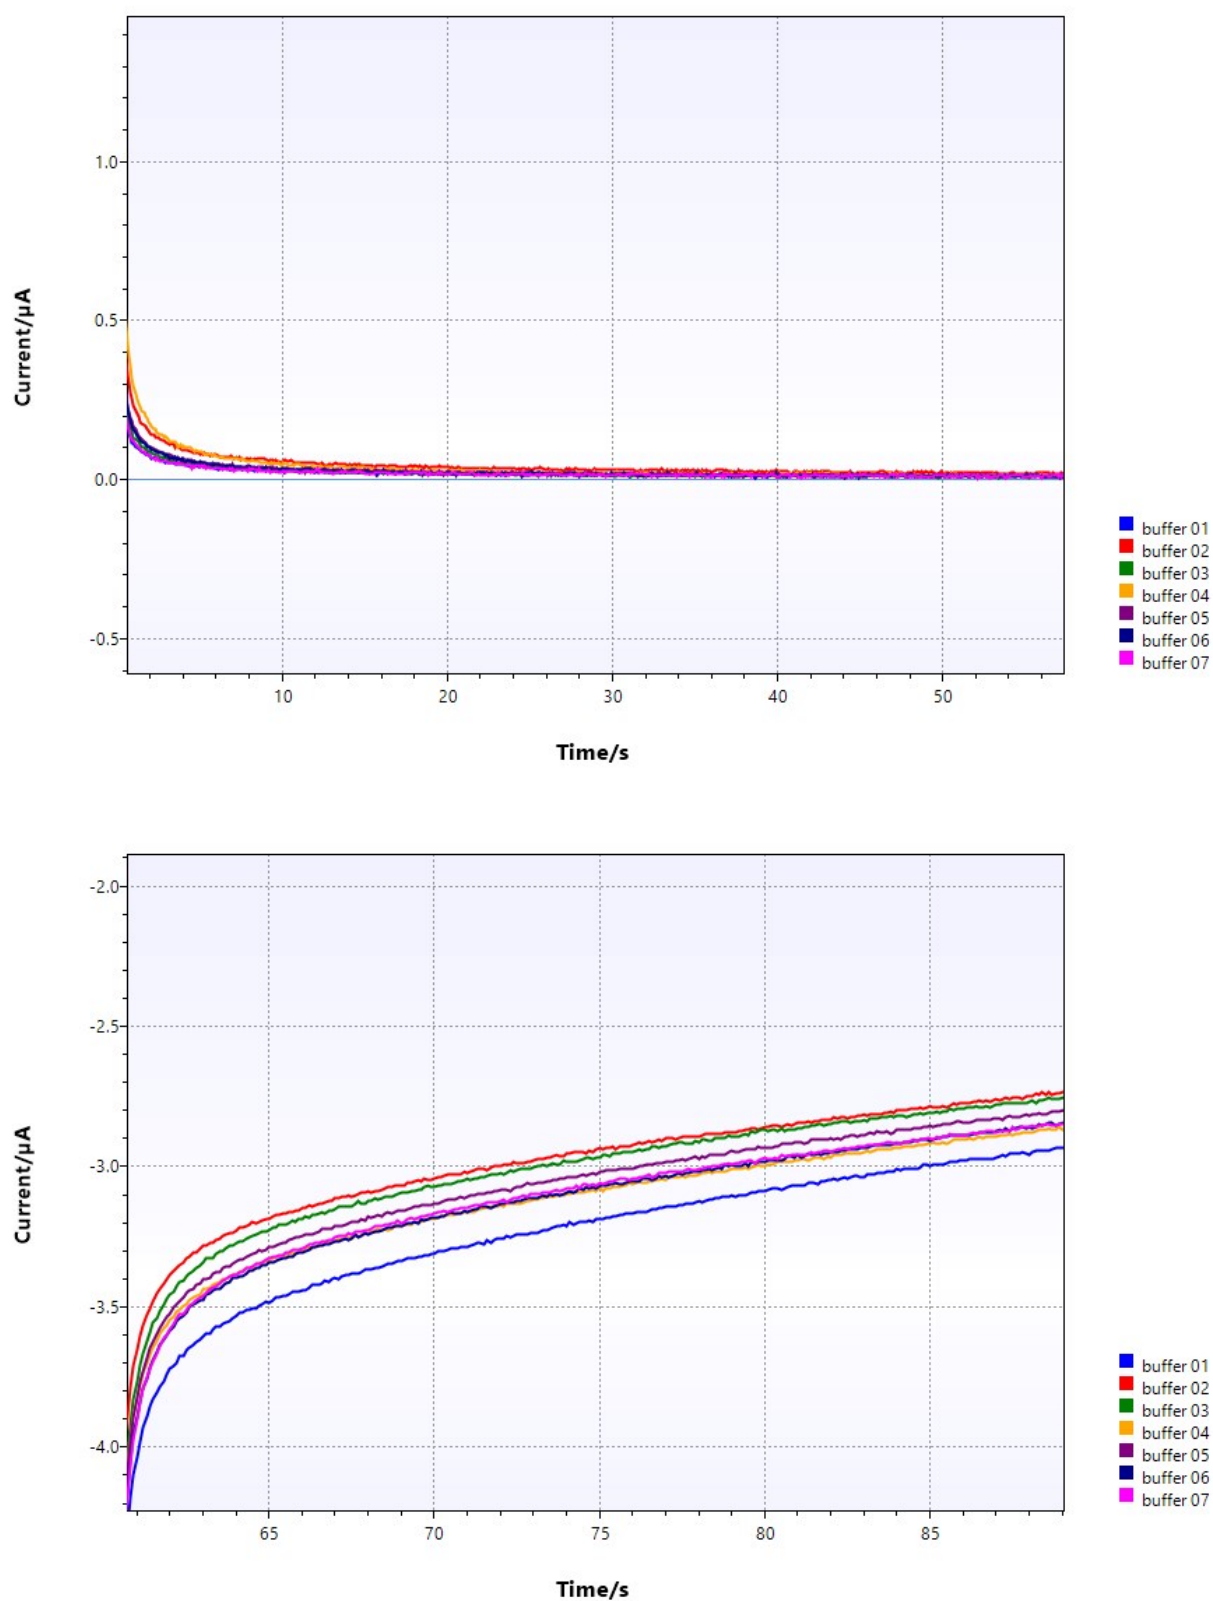

**Figure S11.** Validation of analytical performance/basic lines (blank experiments) of SPE/GO modified by Pd-NPs: responses obtained from Pd-NPs in phosphate buffer in multistep amperometric mode at the potential of 0.2 V (*top*) and -0.08 V (*bottom*).

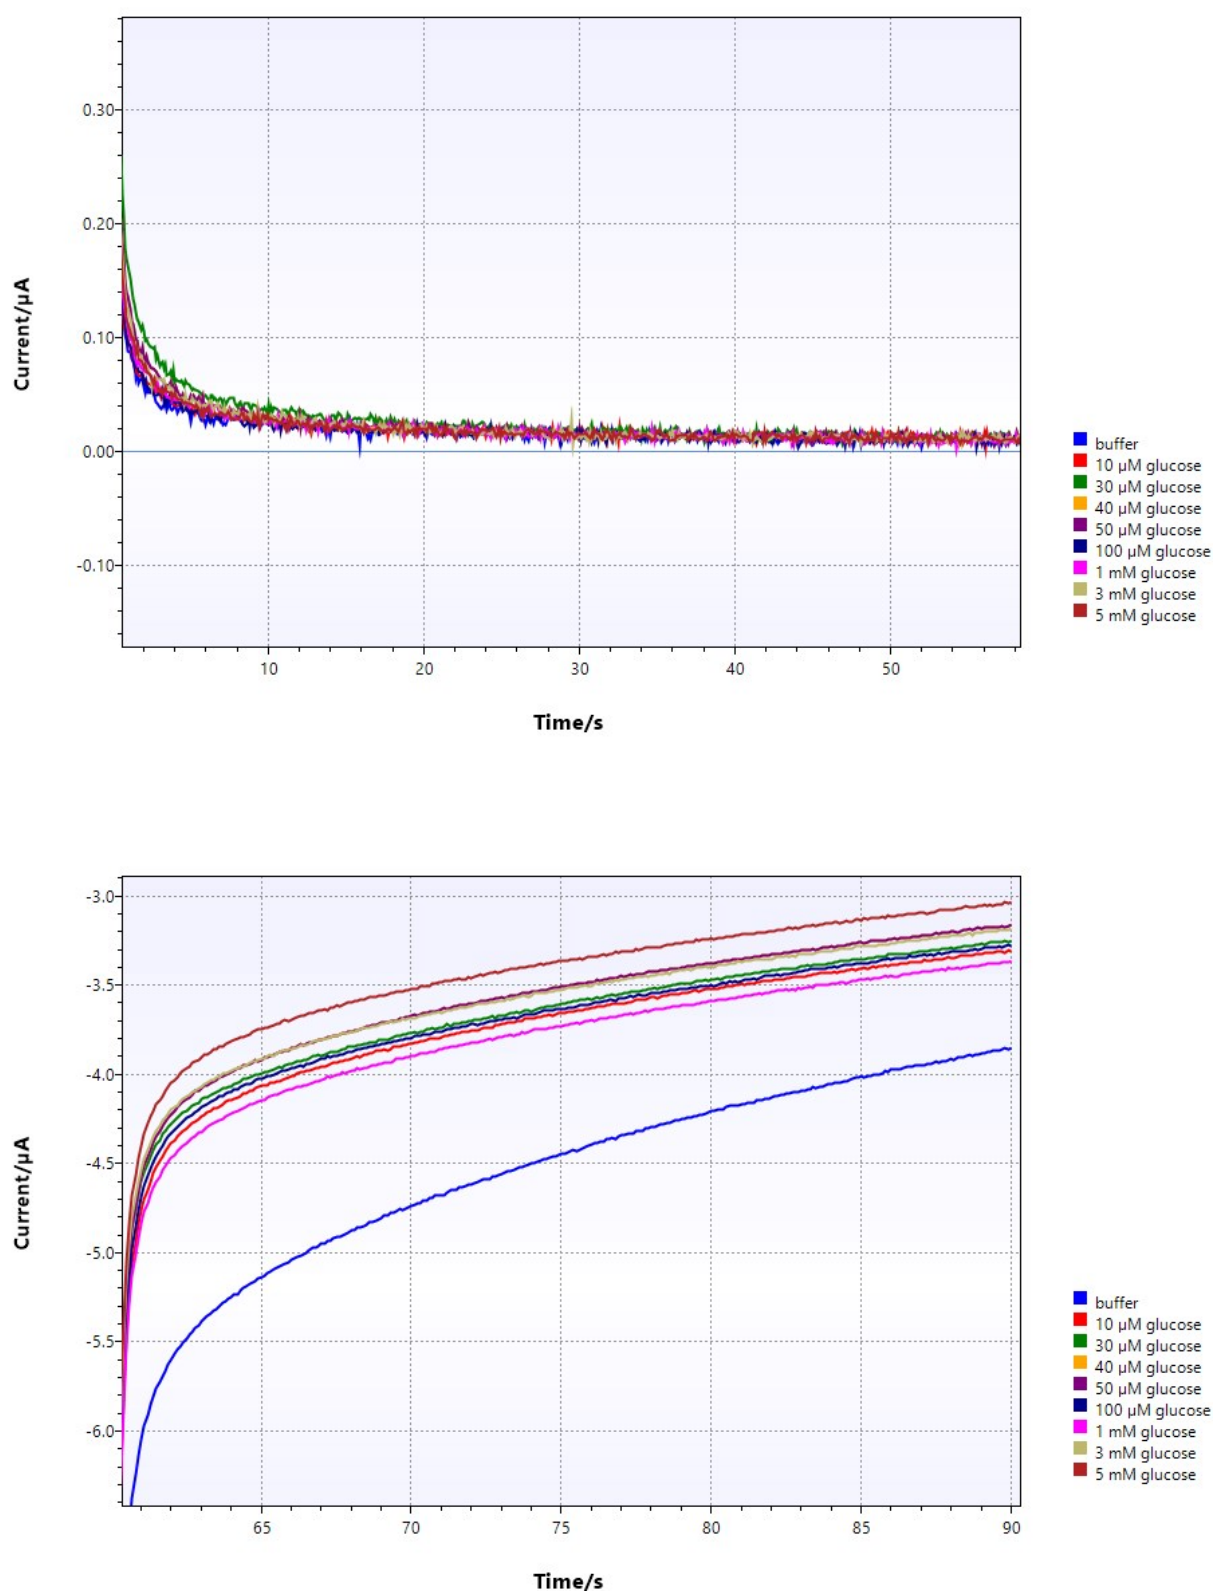

**Figure S12.** Validation of analytical performance/impact of interfering ionic species of SPE/GO modified by Pd-NPs: responses obtained from Pd-NPs in glucose solutions (as a case study) in multistep amperometric mode at the potential of 0.2 V (*top*) and -0.08 V (*bottom*).
